# Supplementary material for: Chan-Chuang and resistance exercise for drug rehabilitation: a randomized controlled trial among Chinese male methamphetamine users
Source: Front Public Health. 2023 Oct 26;11:1180503. doi: 10.3389/fpubh.2023.1180503 (PMC10642185; doi:10.3389/fpubh.2023.1180503)
Supplement: Supplementary file 4 [file Table_4.xlsx]

## Sheet: Table 1.
	Table 4. Participants’ characteristics at the baseline
	Outcome	Control	Chan-Chuang	Resistance	Overall
		Mean (SD)	Mean (SD)	Mean (SD)	Mean (SD)
	Age (year)	35.84 (5.65)	33.58 (6.24)	33.72 (8.42)	34.37 (6.85)
	Drug use history (month)	88.00 (54.53)	69.96 (47.44)	65.52 (36.20)	74.49 (47.07)
	Detention (month)	9.96 (4.21)	7.88 (3.85)	9.00 (5.52)	8.93 (4.59)
	Drug craving*	1.24 (2.47)	2.19 (2.61)	0.60 (1.04)	1.36 (2.24)
	Mental wellbeing*	16.48 (6.95)	20.92 (6.73)	16.44 (6.83)	17.99 (7.07)
	Sleep problem	13.24 (7.85)	16.04 (6.95)	11.56 (7.56)	13.64 (7.59)
	HR (beats/min)	74.68 (9.17)	74.65 (10.64)	72.36 (9.22)	73.91 (9.65)
	SBP (mm Hg)	120.68 (14.36)	112.50 (8.00)	114.88 (12.88)	115.97 (12.34)
	DBP* (mm Hg)	81.80 (10.19)	77.27 (22.40)	72.68 (9.42)	77.25 (15.58)
	MAP* (mm Hg)	94.76 (11.25)	89.01 (16.56)	86.75 (9.88)	90.16 (13.21)
	BMI* (kg/m2)	24.68 (2.52)	22.85 (2.82)	24.26 (2.51)	24.06 (2.66)
	Vital capacity (ml)	2741.12 (668.70)	3037.11 (678.35)	2983.52 (731.59)	2906.32 (695.66)
	Grip (N)	36.98 (8.50)	36.54 (7.19)	31.60 (12.030)	34.93 (9.82)
	Balance (second)	16.52 (21.22)	11.47 (4.46)	11.60 (9.48)	13.35 (14.22)
	Vertical Jump (cm)	33.32 (5.51)	32.19 (4.48)	35.24 (8.06)	33.68 (6.33)
	Note: * indicates statistically significant difference (p < 0.05) among the groups.

## Sheet: Table 2.
	Table S1. Pairwise comparisons among the experimental groups regarding the main effect
	Outcome	Comparison		Crude model				Adjusted model
		Group	Group	MD	p	95%CI		MD	p	95%CI
						Lower	Upper			Lower	Upper
	Drug craving	Chan-Chuang	Control	0.807	0.925	-1.09	2.704	0.298	1	-1.277	1.873
			Resistance	2.114	0	0.873	3.355	1.22	0.052	-0.008	2.448
		Resistance	Control	-1.307	0.115	-2.817	0.203	-0.922	0.069	-1.894	0.05
			Chan-Chuang	-2.114	0	-3.355	-0.873	-1.22	0.052	-2.448	0.008
	Mental wellbeing	Chan-Chuang	Control	4.016	0.078	-0.304	8.336	0.539	1	-2.628	3.705
			Resistance	4.931	0.002	1.425	8.436	0.019	1	-2.806	2.843
		Resistance	Control	-0.915	1	-5.044	3.215	0.52	1	-1.454	2.494
			Chan-Chuang	-4.931	0.002	-8.436	-1.425	-0.019	1	-2.843	2.806
	Poor sleep quality	Chan-Chuang	Control	1.631	1	-2.884	6.145	-0.505	1	-3.592	2.582
			Resistance	4.017	0.067	-0.197	8.231	-0.577	1	-2.926	1.773
		Resistance	Control	-2.387	0.556	-6.699	1.926	0.071	1	-2.272	2.414
			Chan-Chuang	-4.017	0.067	-8.231	0.197	0.577	1	-1.773	2.926
	HR	Chan-Chuang	Control	-4.266	0.05	-8.531	0	-3.922	0.04	-7.718	-0.125
			Resistance	-4.758	0.031	-9.191	-0.326	-2.042	0.419	-5.351	1.267
		Resistance	Control	0.493	1	-3.593	4.579	-1.88	0.376	-4.816	1.057
			Chan-Chuang	4.758	0.031	0.326	9.191	2.042	0.419	-1.267	5.351
	SBP	Chan-Chuang	Control	-4.078	0.146	-9.032	0.877	-0.208	1	-3.617	3.201
			Resistance	1.513	0.477	-1.059	4.086	4.391	0	1.985	6.797
		Resistance	Control	-5.591	0.023	-10.617	-0.565	-4.598	0	-7.392	-1.805
			Chan-Chuang	-1.513	0.477	-4.086	1.059	-4.391	0	-6.797	-1.985
	DBP	Chan-Chuang	Control	-9.69	0	-13.786	-5.595	-8.694	0	-13.208	-4.18
			Resistance	-6.464	0	-9.562	-3.365	-5.629	0.001	-9.342	-1.916
		Resistance	Control	-3.227	0.171	-7.287	0.833	-3.065	0.088	-6.434	0.304
			Chan-Chuang	6.464	0	3.365	9.562	5.629	0.001	1.916	9.342
	MAP	Chan-Chuang	Control	-8.163	0	-12.217	-4.109	-6.332	0.002	-10.77	-1.894
			Resistance	-4.276	0	-6.895	-1.657	-2.745	0.215	-6.391	0.902
		Resistance	Control	-3.888	0.067	-7.961	0.186	-3.587	0.011	-6.532	-0.642
			Chan-Chuang	4.276	0	1.657	6.895	2.745	0.215	-0.902	6.391
	BMI	Chan-Chuang	Control	-1.579	0.173	-3.569	0.412	0.403	0.35	-0.212	1.018
			Resistance	-0.983	0.723	-2.99	1.024	0.565	0.077	-0.041	1.172
		Resistance	Control	-0.596	1	-2.405	1.214	-0.162	1	-0.678	0.354
			Chan-Chuang	0.983	0.723	-1.024	2.99	-0.565	0.077	-1.172	0.041
	Vital capacity	Chan-Chuang	Control	911.711	0	458.434	1364.99	716.487	0	397.403	1035.57
			Resistance	422.111	0.081	-35.102	879.325	394.418	0.01	74.227	714.609
		Resistance	Control	489.6	0.015	70.557	908.643	322.069	0.028	24.849	619.289
			Chan-Chuang	-422.111	0.081	-879.325	35.102	-394.418	0.01	-714.609	-74.227
	Grip strength	Chan-Chuang	Control	14.557	0	6.48	22.633	14.632	0	6.645	22.62
			Resistance	4.142	0.671	-4.005	12.289	3.285	1	-4.939	11.51
		Resistance	Control	10.415	0.003	2.948	17.882	11.347	0.001	3.747	18.947
			Chan-Chuang	-4.142	0.671	-12.289	4.005	-3.285	1	-11.51	4.939
	Balance	Chan-Chuang	Control	14.251	0.015	2.065	26.437	15.774	0.004	3.988	27.559
			Resistance	2.932	1	-9.109	14.974	2.882	1	-8.485	14.25
		Resistance	Control	11.318	0.061	-0.375	23.012	12.891	0.019	1.552	24.231
			Chan-Chuang	-2.932	1	-14.974	9.109	-2.882	1	-14.25	8.485
	Vertical jump	Chan-Chuang	Control	3.108	0.146	-0.666	6.882	3.355	0.052	-0.023	6.733
			Resistance	-1.412	1	-5.153	2.328	-0.07	1	-3.481	3.341
		Resistance	Control	4.52	0.005	1.077	7.963	3.425	0.028	0.27	6.579
			Chan-Chuang	1.412	1	-2.328	5.153	0.07	1	-3.341	3.481
	Note: MD, mean difference. The adjusted model was adjusted for corresponding baseline assessments.

## Sheet: Table 3.
	Table S2. Pairwise comparison between groups at every timepoint (week)
					Drug crving				Mental wellbeing				Poor sleep quality				HR				SBP				DBP				MAP
	Model	Week	Comparison		MD	p	95%CI		MD	p	95%CI		MD	p	95%CI		MD	p	95%CI		MD	p	95%CI		MD	p	95%CI		MD	p	95%CI
			Setting	Setting			Lower	Upper			Lower	Upper			Lower	Upper			Lower	Upper			Lower	Upper			Lower	Upper			Lower	Upper
	Crude	1	Chan-Chuang	Control	0.0938	1	-1.6491	1.8368	4.96	0.022	0.5228	9.3972	0.7446	1	-4.8766	6.3658	6.1585	0.03	0.4279	11.8891	-12.0123	0	-18.6123	-5.4123	-12.9631	0.01	-22.8739	-3.0523	-12.6462	0.002	-20.5493	-4.743
	Crude	1		Resistance	1.3738	0.005	0.3241	2.4236	4.56	0.021	0.5219	8.5981	3.8246	0.241	-1.4101	9.0593	0.6785	1	-5.6723	7.0293	-1.5723	0.608	-7.576	4.4314	1.3969	0.582	-3.571	6.3648	0.4072	0.869	-4.4467	5.2611
	Crude	1	Resistance	Control	-1.28	0.113	-2.7548	0.1948	0.4	1	-4.4876	5.2876	-3.08	0.52	-8.4952	2.3352	5.48	0.05	0.0071	10.9529	-10.44	0.006	-17.9516	-2.9284	-14.36	0.005	-24.346	-4.374	-13.0533	0.002	-21.2815	-4.8252
	Crude	1		Chan-Chuang	-1.3738	0.005	-2.4236	-0.3241	-4.56	0.021	-8.5981	-0.5219	-3.8246	0.241	-9.0593	1.4101	-0.6785	1	-7.0293	5.6723	1.5723	0.608	-4.4314	7.576	-1.3969	0.582	-6.3648	3.571	-0.4072	0.869	-5.2611	4.4467
	Crude	2	Chan-Chuang	Control	0.0877	1	-1.7329	1.9083	6.72	0.002	2.0532	11.3868	3.9908	0.174	-1.0481	9.0296	-12.8	0	-17.4302	-8.1698	5.32	0.029	0.5567	10.0833	—	—	—	—	—	—	—	—
	Crude	2		Resistance	1.3277	0.032	0.0841	2.5713	6.04	0.004	1.5271	10.5529	5.3508	0.046	0.0615	10.64	-8.0909	0	-12.3248	-3.8571	5.5	0	3.3369	7.6631	—	—	—	—	—	—	—	—
	Crude	2	Resistance	Control	-1.24	0.143	-2.7397	0.2597	0.68	1	-3.8074	5.1674	-1.36	1	-6.3571	3.6371	-4.7091	0.217	-10.9832	1.565	-0.18	0.946	-5.4114	5.0514	0.4143	0.859	-4.1437	4.9722	0.7876	0.714	-3.4317	5.0069
	Crude	2		Chan-Chuang	-1.3277	0.032	-2.5713	-0.0841	-6.04	0.004	-10.5529	-1.5271	-5.3508	0.046	-10.64	-0.0615	8.0909	0	3.8571	12.3248	-5.5	0	-7.6631	-3.3369	—	—	—	—	—	—	—	—
	Crude	3	Chan-Chuang	Control	0.76	0.967	-1.079	2.599	3.8523	0.172	-0.9978	8.7024	0.36	1	-4.571	5.291	-6.4038	0.02	-12.0613	-0.7464	-6.4776	0.021	-11.9734	-0.9818	-11.9197	0	-15.8667	-7.9728	-9.9348	0	-14.0071	-5.8625
	Crude	3		Resistance	1.68	0.007	0.3506	3.0094	4.1723	0.076	-0.2968	8.6415	2.44	0.791	-2.7875	7.6675	-6.2788	0.041	-12.3643	-0.1934	-3.2276	0.134	-7.452	0.9969	-9.668	0	-13.2507	-6.0853	-7.7982	0	-11.1774	-4.4191
	Crude	3	Resistance	Control	-0.92	0.404	-2.3923	0.5523	-0.32	1	-4.8152	4.1752	-2.08	0.893	-6.8602	2.7002	-0.125	1	-5.5502	5.3002	-3.25	0.184	-8.0446	1.5446	-2.2517	0.294	-6.4542	1.9507	-2.1365	0.281	-6.0238	1.7507
	Crude	3		Chan-Chuang	-1.68	0.007	-3.0094	-0.3506	-4.1723	0.076	-8.6415	0.2968	-2.44	0.791	-7.6675	2.7875	6.2788	0.041	0.1934	12.3643	3.2276	0.134	-0.9969	7.452	9.668	0	6.0853	13.2507	7.7982	0	4.4191	11.1774
	Crude	4	Chan-Chuang	Control	1.4218	0.504	-1.0478	3.8914	6.44	0.013	1.0416	11.8384	4.24	0.139	-0.8518	9.3318	-7.24	0.016	-13.4636	-1.0164	-4.12	0.123	-9.3542	1.1142	-10.04	0	-14.7351	-5.3449	-8.0667	0	-12.579	-3.5543
	Crude	4		Resistance	2.8052	0.001	1.0064	4.604	8.52	0	3.8496	13.1904	6.84	0.005	1.6646	12.0154	-5.335	0.148	-11.8289	1.1589	3.825	0.074	-0.3652	8.0152	-4.3233	0.076	-9.1052	0.4585	-1.6072	0.446	-5.7385	2.524
	Crude	4	Resistance	Control	-1.3834	0.22	-3.2325	0.4657	-2.08	0.832	-6.6648	2.5048	-2.6	0.465	-6.9773	1.7773	-1.905	1	-7.9772	4.1672	-7.945	0.001	-12.5924	-3.2976	-5.7167	0.05	-11.4358	0.0025	-6.4594	0.012	-11.4813	-1.4376
	Crude	4		Chan-Chuang	-2.8052	0.001	-4.604	-1.0064	-8.52	0	-13.1904	-3.8496	-6.84	0.005	-12.0154	-1.6646	5.335	0.148	-1.1589	11.8289	-3.825	0.074	-8.0152	0.3652	4.3233	0.076	-0.4585	9.1052	1.6072	0.446	-2.524	5.7385
	Crude	5	Chan-Chuang	Control	0.42	1	-2.0118	2.8518	1.64	1	-3.5388	6.8188	0.32	1	-5.2937	5.9337	-2.5	1	-9.4445	4.4445	-6.045	0.023	-11.2643	-0.8257	-9.15	0	-14.2688	-4.0312	-8.115	0.001	-12.7096	-3.5204
	Crude	5		Resistance	1.8617	0.02	0.2236	3.4998	2.4433	0.565	-2.0044	6.891	2.5767	0.762	-2.8297	7.983	-5.625	0.178	-12.7658	1.5158	0.75	0.71	-3.2065	4.7065	-6.25	0.015	-11.2805	-1.2195	-3.9167	0.058	-7.9637	0.1303
	Crude	5	Resistance	Control	-1.4417	0.252	-3.438	0.5547	-0.8033	1	-5.5861	3.9794	-2.2567	0.778	-7.046	2.5327	3.125	0.696	-3.1344	9.3844	-6.795	0.006	-11.6749	-1.9151	-2.9	0.179	-7.1264	1.3264	-4.1983	0.044	-8.2768	-0.1199
	Crude	5		Chan-Chuang	-1.8617	0.02	-3.4998	-0.2236	-2.4433	0.565	-6.891	2.0044	-2.5767	0.762	-7.983	2.8297	5.625	0.178	-1.5158	12.7658	-0.75	0.71	-4.7065	3.2065	6.25	0.015	1.2195	11.2805	3.9167	0.058	-0.1303	7.9637
	Crude	6	Chan-Chuang	Control	1.4169	0.322	-0.6901	3.5239	1.7923	1	-3.5845	7.1691	1.2815	1	-3.8892	6.4522	-4.4354	0.445	-11.78	2.9092	-5	0.062	-10.2533	0.2533	-8.6292	0	-12.8434	-4.415	-7.4267	0	-11.3508	-3.5025
	Crude	6		Resistance	2.3769	0.002	0.7217	4.0321	3.3523	0.169	-0.8525	7.5571	3.8815	0.168	-0.9825	8.7456	-5.3154	0.204	-12.2876	1.6568	1.92	0.18	-0.8864	4.7264	-10.3892	0	-14.055	-6.7235	-6.2933	0	-9.0866	-3.5001
	Crude	6	Resistance	Control	-0.96	0.282	-2.3323	0.4123	-1.56	1	-6.3473	3.2273	-2.6	0.523	-7.1837	1.9837	0.88	1	-4.2887	6.0487	-6.92	0.009	-12.0773	-1.7627	1.76	0.4	-2.3411	5.8611	-1.1333	0.568	-5.0207	2.754
	Crude	6		Chan-Chuang	-2.3769	0.002	-4.0321	-0.7217	-3.3523	0.169	-7.5571	0.8525	-3.8815	0.168	-8.7456	0.9825	5.3154	0.204	-1.6568	12.2876	-1.92	0.18	-4.7264	0.8864	10.3892	0	6.7235	14.055	6.2933	0	3.5001	9.0866
	Crude	7	Chan-Chuang	Control	0.2692	1	-2.1527	2.6912	5.9092	0.023	0.5958	11.2226	1.6846	1	-4.037	7.4063	-3.2815	0.932	-11.0312	4.4681	-1.6646	0.442	-5.9048	2.5756	-6.7538	0.009	-11.807	-1.7007	-5.0574	0.018	-9.2508	-0.8641
	Crude	7		Resistance	2.1892	0.001	0.7239	3.6546	7.8692	0	3.3259	12.4125	3.9646	0.213	-1.2908	9.22	-3.7215	0.703	-11.212	3.7689	1.6154	0.363	-1.868	5.0988	-3.9138	0.065	-8.0689	0.2412	-2.0708	0.208	-5.2957	1.1541
	Crude	7	Resistance	Control	-1.92	0.055	-3.8666	0.0266	-1.96	0.962	-6.686	2.766	-2.28	0.79	-7.1608	2.6008	0.44	1	-5.5555	6.4355	-3.28	0.152	-7.7721	1.2121	-2.84	0.243	-7.6104	1.9304	-2.9867	0.164	-7.196	1.2226
	Crude	7		Chan-Chuang	-2.1892	0.001	-3.6546	-0.7239	-7.8692	0	-12.4125	-3.3259	-3.9646	0.213	-9.22	1.2908	3.7215	0.703	-3.7689	11.212	-1.6154	0.363	-5.0988	1.868	3.9138	0.065	-0.2412	8.0689	2.0708	0.208	-1.1541	5.2957
	Crude	8	Chan-Chuang	Control	1.9885	0.14	-0.404	4.381	0.8138	1	-4.0307	5.6583	0.4246	1	-4.9117	5.7609	-3.6218	0.594	-10.3562	3.1126	-2.6231	0.291	-7.4959	2.2498	-8.72	0	-13.2414	-4.1986	-6.7733	0.001	-10.6647	-2.882
	Crude	8		Resistance	3.2985	0	1.5264	5.0705	2.4872	0.474	-1.729	6.7034	3.2596	0.261	-1.3022	7.8214	-4.3785	0.274	-10.5875	1.8306	3.2969	0.085	-0.4582	7.0521	-8.8	0	-13.2352	-4.3648	-4.8533	0.004	-8.154	-1.5526
	Crude	8	Resistance	Control	-1.31	0.195	-3.0093	0.3893	-1.6733	1	-6.5466	3.1999	-2.835	0.549	-7.9327	2.2627	0.7567	1	-4.9667	6.4801	-5.92	0.023	-11.0412	-0.7988	0.08	0.969	-3.9216	4.0816	-1.92	0.333	-5.8054	1.9654
	Crude	8		Chan-Chuang	-3.2985	0	-5.0705	-1.5264	-2.4872	0.474	-6.7034	1.729	-3.2596	0.261	-7.8214	1.3022	4.3785	0.274	-1.8306	10.5875	-3.2969	0.085	-7.0521	0.4582	8.8	0	4.3648	13.2352	4.8533	0.004	1.5526	8.154
	Adjusted	1	Chan-Chuang	Control	-0.4244	1	-1.9021	1.0533	1.4663	0.865	-1.8406	4.7733	-1.4378	0.979	-4.9436	2.0679	6.1729	0.006	1.4237	10.922	-7.4652	0.006	-13.268	-1.6623	-11.9835	0.048	-23.8771	-0.0899	-10.8689	0.015	-20.1115	-1.6263
	Adjusted	1		Resistance	0.5073	0.651	-0.4764	1.4909	1.0349	1	-1.594	3.6638	0.332	1	-2.3314	2.9953	-0.586	1	-4.6818	3.5098	-0.2493	1	-5.0904	4.5918	0.4047	1	-4.8274	5.6369	-0.2936	1	-5.0673	4.4801
	Adjusted	1	Resistance	Control	-0.9317	0.114	-2.0074	0.144	0.4315	1	-1.818	2.6809	-1.7698	0.295	-4.3318	0.7922	6.7588	0	3.1503	10.3674	-7.2159	0.001	-12.1252	-2.3065	-12.3883	0.037	-24.2261	-0.5504	-10.5753	0.015	-19.5754	-1.5752
	Adjusted	1		Chan-Chuang	-0.5073	0.651	-1.4909	0.4764	-1.0349	1	-3.6638	1.594	-0.332	1	-2.9953	2.3314	0.586	1	-3.5098	4.6818	0.2493	1	-4.5918	5.0904	-0.4047	1	-5.6369	4.8274	0.2936	1	-4.4801	5.0673
	Adjusted	2	Chan-Chuang	Control	-0.4306	1	-2.0498	1.1886	3.2263	0.097	-0.3831	6.8358	1.8083	0.699	-1.8219	5.4386	-10.2203	0	-14.1713	-6.2692	3.4745	0.182	-0.9584	7.9073	—	—	—	—	—	—	—	—
	Adjusted	2		Resistance	0.4611	1	-0.8121	1.7343	2.1375	0.305	-0.9872	5.2622	2.1077	0.188	-0.6019	4.8173	-3.631	0.003	-6.2858	-0.9762	4.6662	0	3.4788	5.8536	—	—	—	—	—	—	—	—
	Adjusted	2	Resistance	Control	-0.8917	0.166	-2.0054	0.222	1.0889	0.709	-1.1119	3.2897	-0.2994	1	-2.9995	2.4007	-6.5893	0.001	-10.9266	-2.252	-1.1917	1	-5.7241	3.3406	-0.1077	0.957	-4.0029	3.7876	-0.0744	0.966	-3.4521	3.3033
	Adjusted	2		Chan-Chuang	-0.4611	1	-1.7343	0.8121	-2.1375	0.305	-5.2622	0.9872	-2.1077	0.188	-4.8173	0.6019	3.631	0.003	0.9762	6.2858	-4.6662	0	-5.8536	-3.4788	—	—	—	—	—	—	—	—
	Adjusted	3	Chan-Chuang	Control	0.2158	1	-1.4745	1.906	0.3587	1	-3.5507	4.268	-1.8224	0.618	-5.273	1.6281	-6.0293	0.028	-11.5897	-0.4689	-1.6599	1	-7.0777	3.7579	-10.9251	0	-15.7471	-6.1031	-8.1326	0	-12.7453	-3.52
	Adjusted	3		Resistance	0.7874	0.492	-0.5675	2.1424	-0.8625	1	-4.3469	2.6218	-1.8325	0.421	-4.8083	1.1432	-1.8849	0.881	-6.183	2.4131	2.0302	0.791	-2.3179	6.3782	-8.4176	0	-12.9396	-3.8957	-5.5453	0.006	-9.8611	-1.2296
	Adjusted	3	Resistance	Control	-0.5717	0.646	-1.6762	0.5328	1.2212	0.599	-1.0582	3.5006	0.0101	1	-2.1454	2.1655	-4.1444	0.112	-8.9116	0.6229	-3.6901	0.067	-7.5544	0.1743	-2.5075	0.49	-6.8138	1.7988	-2.5873	0.241	-6.1298	0.9552
	Adjusted	3		Chan-Chuang	-0.7874	0.492	-2.1424	0.5675	0.8625	1	-2.6218	4.3469	1.8325	0.421	-1.1432	4.8083	1.8849	0.881	-2.4131	6.183	-2.0302	0.791	-6.3782	2.3179	8.4176	0	3.8957	12.9396	5.5453	0.006	1.2296	9.8611
	Adjusted	4	Chan-Chuang	Control	0.8707	1	-1.3055	3.0468	3.1375	0.248	-1.1907	7.4657	2.3059	0.75	-2.4912	7.1031	-7.1959	0.013	-13.2169	-1.1749	0.4827	1	-5.813	6.7784	-9.0714	0.002	-15.3604	-2.7825	-6.2896	0.045	-12.4883	-0.0908
	Adjusted	4		Resistance	1.8464	0.041	0.0525	3.6403	3.2674	0.159	-0.7732	7.3081	1.5992	1	-2.6209	5.8194	-2.7029	0.586	-7.7004	2.2946	7.1464	0.002	2.1718	12.121	-4.5907	0.098	-9.7335	0.5521	-1.2463	1	-5.9535	3.4609
	Adjusted	4	Resistance	Control	-0.9758	0.238	-2.3066	0.355	-0.1299	1	-2.4516	2.1918	0.7067	1	-2.0611	3.4744	-4.493	0.044	-8.9019	-0.0841	-6.6637	0	-10.8734	-2.454	-4.4807	0.25	-10.6743	1.7128	-5.0433	0.052	-10.1141	0.0275
	Adjusted	4		Chan-Chuang	-1.8464	0.041	-3.6403	-0.0525	-3.2674	0.159	-7.3081	0.7732	-1.5992	1	-5.8194	2.6209	2.7029	0.586	-2.2946	7.7004	-7.1464	0.002	-12.121	-2.1718	4.5907	0.098	-0.5521	9.7335	1.2463	1	-3.4609	5.9535
	Adjusted	5	Chan-Chuang	Control	-0.0861	1	-2.1049	1.9326	-1.9141	0.873	-6.2537	2.4254	-1.7389	1	-6.2456	2.7679	-2.6148	0.755	-8.0747	2.845	-1.1041	1	-6.7719	4.5637	-8.1393	0.008	-14.6283	-1.6502	-6.235	0.033	-12.1119	-0.3581
	Adjusted	5		Resistance	0.8929	0.552	-0.7158	2.5016	-2.3401	0.385	-6.0253	1.3451	-1.5541	0.922	-5.1975	2.0893	-1.7434	1	-6.7211	3.2342	4.2706	0.045	0.0734	8.4678	-5.3041	0.121	-11.4989	0.8906	-2.3619	0.823	-7.5345	2.8107
	Adjusted	5	Resistance	Control	-0.9791	0.282	-2.378	0.4199	0.4259	1	-2.2407	3.0926	-0.1848	1	-3.092	2.7224	-0.8714	1	-5.3707	3.6279	-5.3747	0.006	-9.562	-1.1874	-2.8351	0.361	-7.2035	1.5332	-3.8731	0.051	-7.7611	0.0148
	Adjusted	5		Chan-Chuang	-0.8929	0.552	-2.5016	0.7158	2.3401	0.385	-1.3451	6.0253	1.5541	0.922	-2.0893	5.1975	1.7434	1	-3.2342	6.7211	-4.2706	0.045	-8.4678	-0.0734	5.3041	0.121	-0.8906	11.4989	2.3619	0.823	-2.8107	7.5345
	Adjusted	6	Chan-Chuang	Control	0.8986	0.789	-1.0229	2.8202	-1.7013	1	-6.0951	2.6924	-0.9009	1	-5.1238	3.322	-4.421	0.505	-12.104	3.262	-0.1972	1	-5.3586	4.9643	-7.6497	0.001	-12.6645	-2.6348	-5.5218	0.019	-10.3712	-0.6723
	Adjusted	6		Resistance	1.5103	0.081	-0.1244	3.1451	-2.2172	0.497	-6.0476	1.6132	-1.5452	0.79	-4.8522	1.7619	-2.8094	0.938	-9.4691	3.8502	5.6111	0.001	1.9076	9.3146	-8.6919	0	-13.4398	-3.944	-3.9101	0.088	-8.2029	0.3827
	Adjusted	6	Resistance	Control	-0.6117	0.439	-1.6194	0.396	0.5159	1	-2.1323	3.1641	0.6443	1	-2.3127	3.6012	-1.6115	1	-6.1753	2.9522	-5.8082	0.003	-9.9742	-1.6423	1.0422	1	-3.3176	5.402	-1.6116	0.907	-5.3531	2.1299
	Adjusted	6		Chan-Chuang	-1.5103	0.081	-3.1451	0.1244	2.2172	0.497	-1.6132	6.0476	1.5452	0.79	-1.7619	4.8522	2.8094	0.938	-3.8502	9.4691	-5.6111	0.001	-9.3146	-1.9076	8.6919	0	3.944	13.4398	3.9101	0.088	-0.3827	8.2029
	Adjusted	7	Chan-Chuang	Control	-0.1892	1	-2.2353	1.8569	2.4156	0.618	-2.1567	6.9879	-0.4978	1	-5.1707	4.1751	-3.2671	0.923	-10.9341	4.3999	2.8825	0.372	-1.6035	7.3686	-5.7743	0.15	-12.8226	1.274	-3.2802	0.584	-9.335	2.7746
	Adjusted	7		Resistance	1.3226	0.11	-0.1935	2.8387	1.9537	0.666	-1.8759	5.7833	-1.5869	0.987	-5.4781	2.3043	-0.9069	1	-7.7288	5.915	5.1397	0.003	1.3842	8.8952	-2.6921	0.898	-8.9038	3.5195	-0.2523	1	-5.5217	5.0171
	Adjusted	7	Resistance	Control	-1.5118	0.021	-2.8526	-0.171	0.4618	1	-2.7031	3.6268	1.0891	1	-2.0061	4.1843	-2.3602	0.571	-6.6737	1.9532	-2.2572	0.422	-5.9263	1.412	-3.0821	0.477	-8.3228	2.1585	-3.0279	0.259	-7.2555	1.1997
	Adjusted	7		Chan-Chuang	-1.3226	0.11	-2.8387	0.1935	-1.9537	0.666	-5.7833	1.8759	1.5869	0.987	-2.3043	5.4781	0.9069	1	-5.915	7.7288	-5.1397	0.003	-8.8952	-1.3842	2.6921	0.898	-3.5195	8.9038	0.2523	1	-5.0171	5.5217
	Adjusted	8	Chan-Chuang	Control	1.53	0.202	-0.471	3.5311	-2.6798	0.299	-6.5762	1.2166	-1.7578	0.992	-6.0834	2.5677	-3.7985	0.516	-10.4582	2.8613	1.924	1	-3.4918	7.3399	-7.6563	0.012	-14.0245	-1.2881	-4.8684	0.138	-10.7104	0.9735
	Adjusted	8		Resistance	2.4319	0.002	0.7463	4.1174	-2.8255	0.122	-6.1316	0.4806	-2.132	0.316	-5.2824	1.0184	-2.0709	1	-7.3247	3.1829	6.5099	0	2.4608	10.559	-7.4942	0.013	-13.7587	-1.2296	-2.9649	0.534	-8.2335	2.3037
	Adjusted	8	Resistance	Control	-0.9018	0.184	-2.0563	0.2527	0.1457	1	-2.3593	2.6507	0.3742	1	-2.879	3.6273	-1.7275	1	-6.5498	3.0948	-4.5859	0.027	-8.7816	-0.3902	-0.1621	1	-4.359	4.0347	-1.9035	0.691	-5.7019	1.8949
	Adjusted	8		Chan-Chuang	-2.4319	0.002	-4.1174	-0.7463	2.8255	0.122	-0.4806	6.1316	2.132	0.316	-1.0184	5.2824	2.0709	1	-3.1829	7.3247	-6.5099	0	-10.559	-2.4608	7.4942	0.013	1.2296	13.7587	2.9649	0.534	-2.3037	8.2335
	Note: MD, mean difference. The adjusted model was adjusted for corresponding baseline assessments.

## Sheet: Table 4.
	Table S3. The main effects of interventions
	Outcome	Comparison		Mean difference (MD)	p	95%CI
		Group	Group			Lower	Upper
	Drug craving	Chan-Chuang	Control	0.4936	1	-1.0557	2.0429
			Resistance	1.2554	0.034	0.069	2.4418
		Resistance	Control	-0.7618	0.235	-1.7979	0.2742
			Chan-Chuang	-1.2554	0.034	-2.4418	-0.069
	Mental wellbeing	Chan-Chuang	Control	0.3799	1	-2.5304	3.2901
			Resistance	-0.014	1	-2.6499	2.622
		Resistance	Control	0.3938	1	-1.664	2.4516
			Chan-Chuang	0.014	1	-2.622	2.6499
	Poor sleep quality	Chan-Chuang	Control	-0.6131	1	-3.87	2.6439
			Resistance	-0.4568	1	-2.9141	2.0006
		Resistance	Control	-0.1563	1	-2.6153	2.3027
			Chan-Chuang	0.4568	1	-2.0006	2.9141
	HR	Chan-Chuang	Control	-4.164	0.029	-8.0107	-0.3172
			Resistance	-2.1094	0.334	-5.2798	1.0611
		Resistance	Control	-2.0546	0.389	-5.2991	1.1899
			Chan-Chuang	2.1094	0.334	-1.0611	5.2798
	SBP	Chan-Chuang	Control	0.2615	1	-3.4196	3.9426
			Resistance	4.403	0	1.9336	6.8723
		Resistance	Control	-4.1415	0.002	-7.03	-1.2529
			Chan-Chuang	-4.403	0	-6.8723	-1.9336
	DBP	Chan-Chuang	Control	-8.5208	0	-13.0013	-4.0403
			Resistance	-5.7047	0.001	-9.5054	-1.904
		Resistance	Control	-2.8161	0.151	-6.2611	0.629
			Chan-Chuang	5.7047	0.001	1.904	9.5054
	MAP	Chan-Chuang	Control	-6.1603	0.003	-10.5832	-1.7375
			Resistance	-2.892	0.204	-6.6866	0.9025
		Resistance	Control	-3.2683	0.027	-6.2667	-0.27
			Chan-Chuang	2.892	0.204	-0.9025	6.6866
	Note: The analysis was adjusted for baseline and participants’ characteristics (including age, drug abuse history, and detention duration).
